# Supplementary material for: Exploring the Bacterial Communities of the Kaiafas Thermal Spring Anigrides Nymphes in Greece Prior to Rehabilitation Actions
Source: MDPI journal article supplement (doi:10.3390/ijerph17239133), 2020-12-07
Supplement: s1 [file s1]

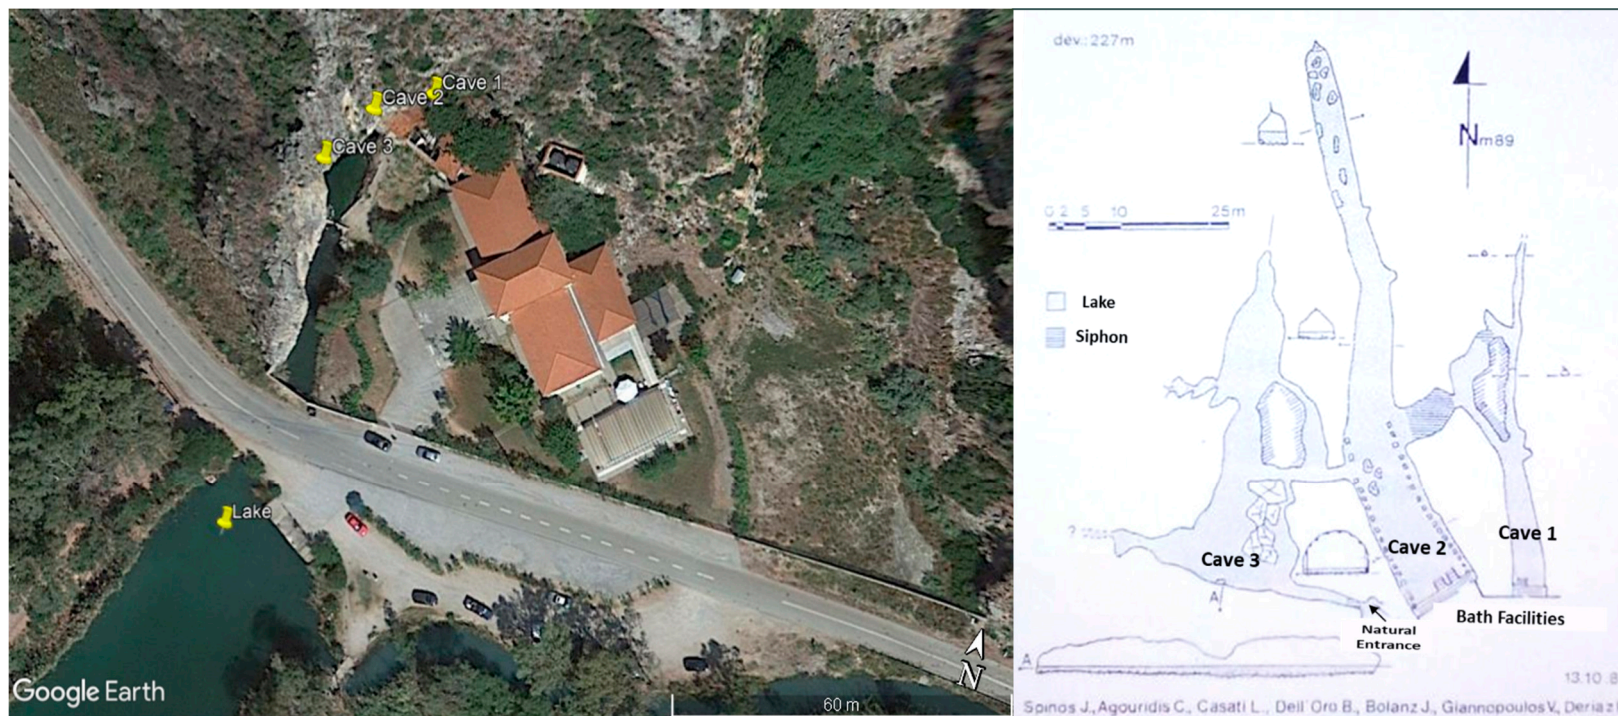

**Supplementary Figure 1.** Map of Kaiafas thermal spring Anigrides Nymphes located in regional unit of Ileia of Western Greece Prefecture (Greece). The sampling points (Lake, Cave 1-3) are indicated by the yellow pins (left figure). The sampling points Cave 1-3 are indicated on the topography plan of Anigrides Nymphes [Spinou, J.; Agouridis, C.; Casati, L.; Dell' Oro, B.; Bolanz, J.; Giannopoulos, V.; Deriaz, P. 1989] (right figure).
