# Supplementary material for: Exploring the Bacterial Communities of the Kaiafas Thermal Spring Anigrides Nymphes in Greece Prior to Rehabilitation Actions
Source: MDPI journal article supplement (doi:10.3390/ijerph17239133), 2020-12-07
Supplement: s2 [file s2]

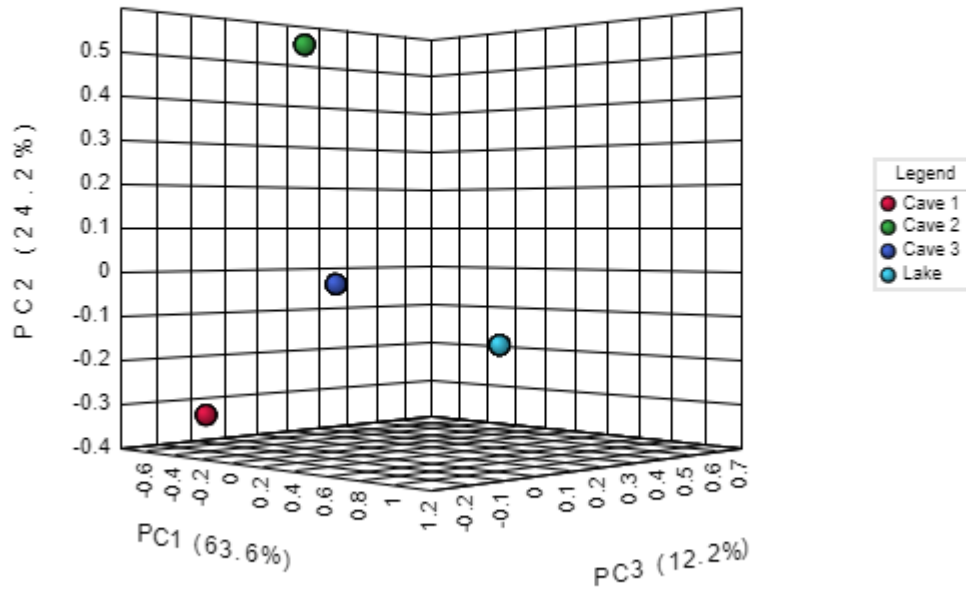

**Supplementary Figure 2.** Principal component analysis (PCA) 3D score plot based on bacterial families detected in thermal waters of Lake, Cave 1, Cave 2, Cave 3 of the Kaiafas thermal spring Anigrades Nymphes in Greece by metataxonomic analysis. The explained variances are shown in brackets. The total variance of the data set (100%) could be explained by the 3 first PCs.
